# Supplementary figures and images for: Synthesis and structure of tris(1,2-benzoquinone diimine)osmium(II) perchlorate, and its redox and spectroelectrochemical series ‡
Source: Royal Society of Chemistry journal article supplement (doi:10.1039/b006808j), 2001-01-01

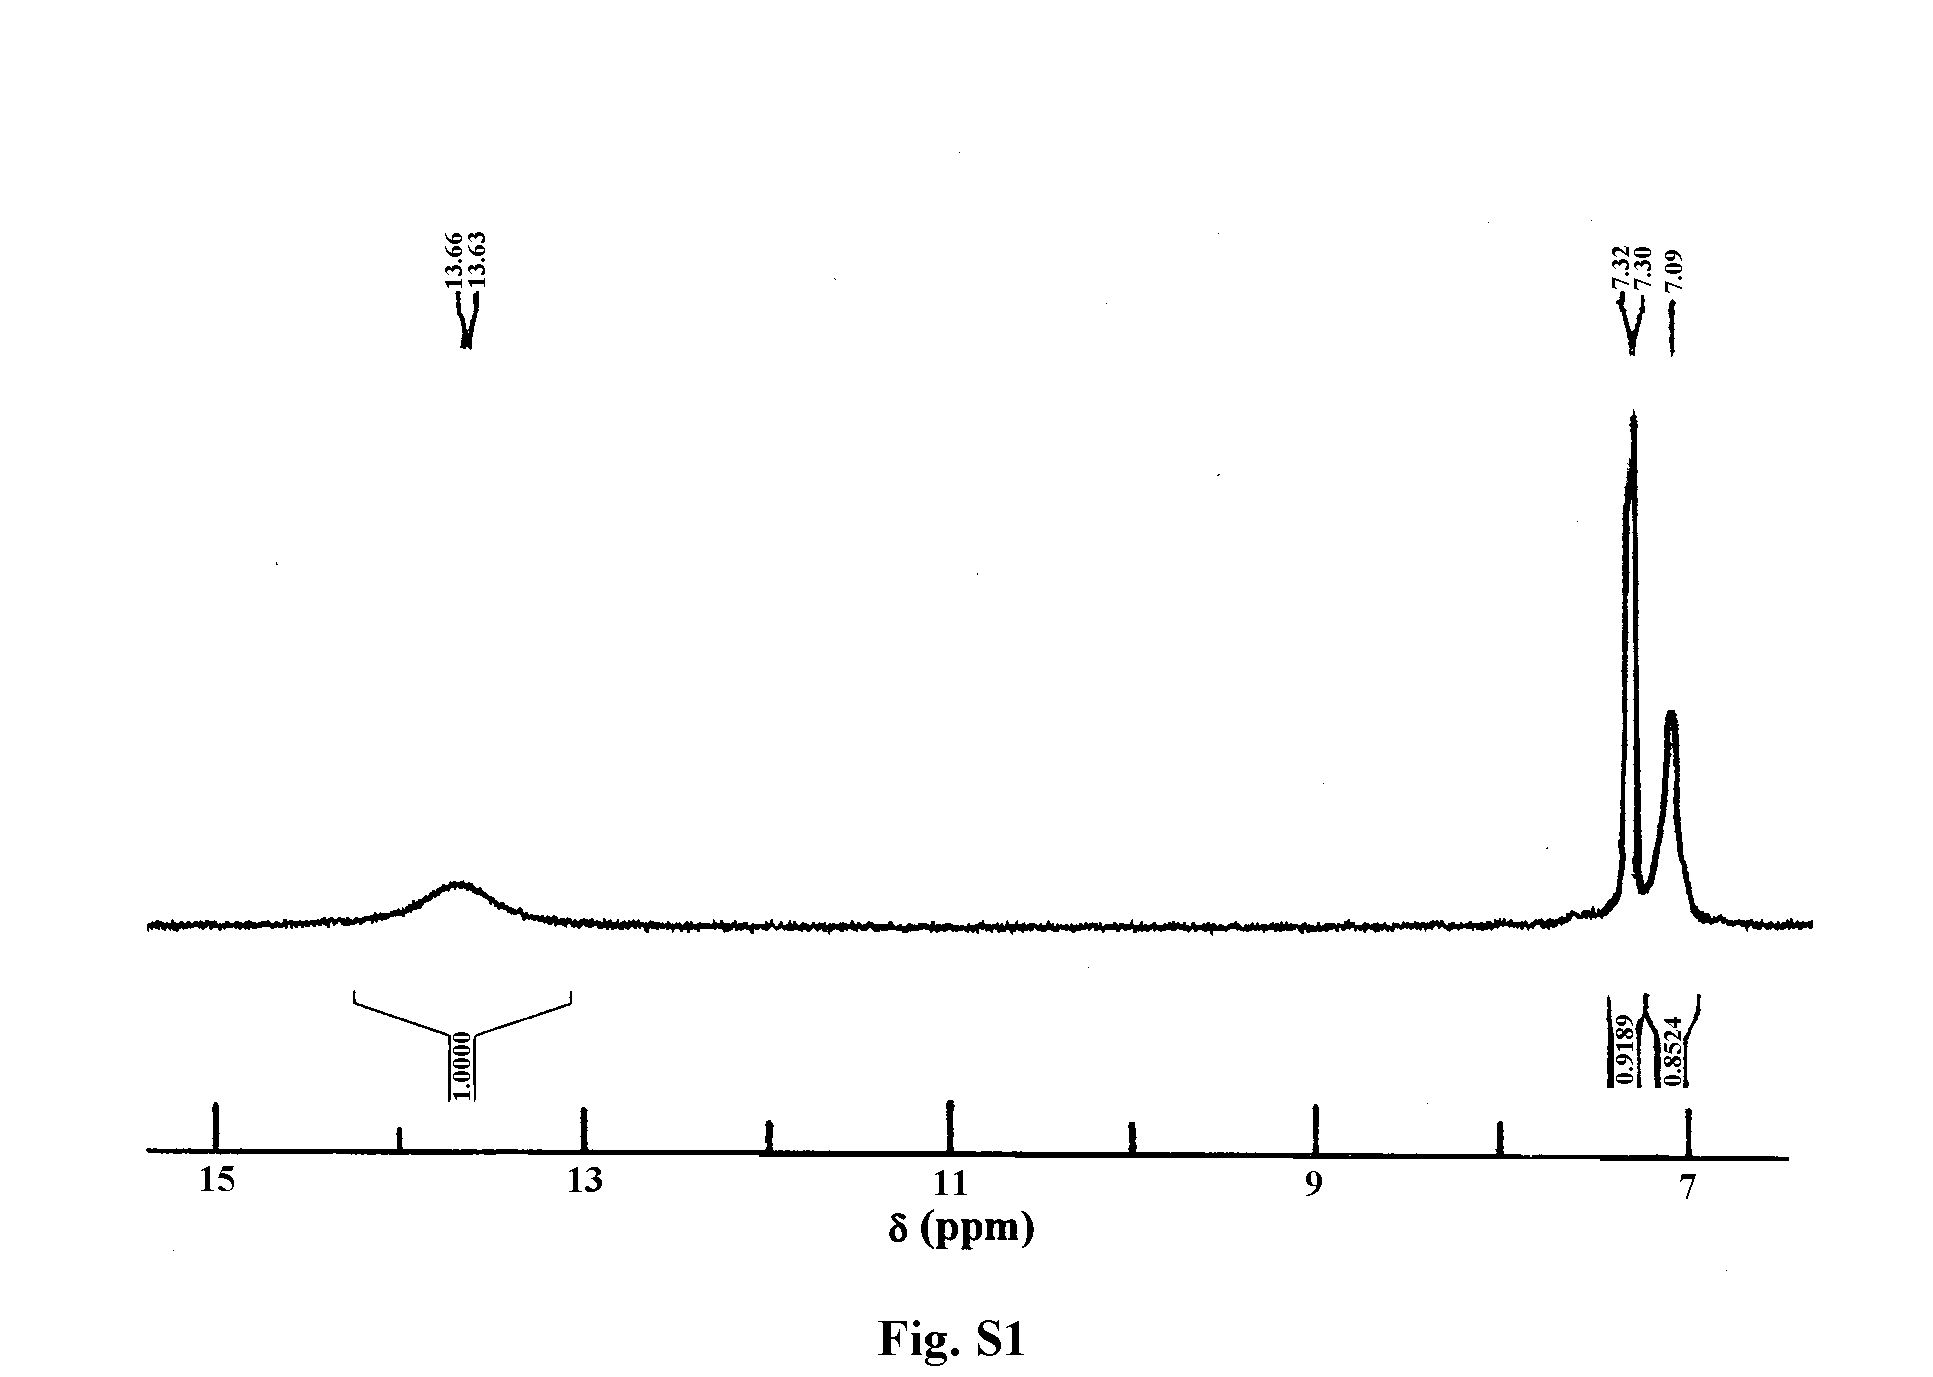

Supplement: figs1.doc [file figs1.doc]
